# Supplementary material for: 68Ga-Labeled [Thz14]Bombesin(7–14) Analogs: Promising GRPR-Targeting Agonist PET Tracers with Low Pancreas Uptake
Source: MDPI journal article supplement (doi:10.3390/molecules28041977), 2023-02-20
Supplement: s1 [file s1]

## SUPPLEMENTAL INFORMATION

**Table S1:** HPLC purification conditions and MS characterizations of TacBOMB2, TacBOMB3, and TacBOMB4.

| Compound name | HPLC conditions                                         | Retention time (min) | Yield (%) | Calculated mass (m/z)         | Found (m/z)                   |
|---------------|---------------------------------------------------------|----------------------|-----------|-------------------------------|-------------------------------|
| TacBOMB2      | 23% CH <sub>3</sub> CN and 0.1% TFA in H <sub>2</sub> O | 11.3                 | 30        | [M+2H] <sup>2+</sup><br>799.4 | [M+2H] <sup>2+</sup><br>799.6 |
| TacBOMB3      | 25% CH <sub>3</sub> CN and 0.1% TFA in H <sub>2</sub> O | 13.0                 | 38        | [M+2H] <sup>2+</sup><br>824.4 | [M+2H] <sup>2+</sup><br>824.9 |
| TacBOMB4      | 25% CH <sub>3</sub> CN and 0.1% TFA in H <sub>2</sub> O | 15.9                 | 55        | [M+2H] <sup>2+</sup><br>824.9 | [M+2H] <sup>2+</sup><br>825.1 |

**Table S2:** HPLC purification conditions and MS characterizations of Ga-TacBOMB2, Ga-TacBOMB3, and Ga-TacBOMB4.

| Compound name | HPLC conditions                                         | Retention time (min) | Yield (%) | Calculated mass (m/z)         | Found (m/z)                   |
|---------------|---------------------------------------------------------|----------------------|-----------|-------------------------------|-------------------------------|
| Ga-TacBOMB2   | 23% CH <sub>3</sub> CN and 0.1% TFA in H <sub>2</sub> O | 12.0                 | 82        | [M+2H] <sup>2+</sup><br>833.9 | [M+2H] <sup>2+</sup><br>833.7 |
| Ga-TacBOMB3   | 25% CH <sub>3</sub> CN and 0.1% TFA in H <sub>2</sub> O | 13.9                 | 63        | [M+2H] <sup>2+</sup><br>858.9 | [M+2H] <sup>2+</sup><br>858.5 |
| Ga-TacBOMB4   | 25% CH <sub>3</sub> CN and 0.1% TFA in H <sub>2</sub> O | 17.3                 | 58        | [M+2H] <sup>2+</sup><br>859.4 | [M+2H] <sup>2+</sup><br>858.8 |

**Table S3:** HPLC conditions for the purification and quality control of <sup>68</sup>Ga-labeled TacBOMB2, TacBOMB3, and AMBA. FA: formic acid.

| Compound name             | HPLC conditions |                                                                                | Retention time (min) |
|---------------------------|-----------------|--------------------------------------------------------------------------------|----------------------|
| <sup>68</sup> Ga-TacBOMB2 | Semi-Prep       | 19% CH <sub>3</sub> CN and 0.1% FA in H <sub>2</sub> O; flow rate 4.5 mL/min   | 12.1                 |
|                           | QC              | 21% CH <sub>3</sub> CN and 0.1% FA in H <sub>2</sub> O; flow rate 2.0 mL/min   | 5.8                  |
| <sup>68</sup> Ga-TacBOMB3 | Semi-Prep       | 19% CH <sub>3</sub> CN and 0.1% FA in H <sub>2</sub> O; flow rate 4.5 mL/min   | 17.0                 |
|                           | QC              | 22% CH <sub>3</sub> CN and 0.1% FA in H <sub>2</sub> O; flow rate 2 mL/min     | 4.7                  |
| <sup>68</sup> Ga-AMBA     | Semi-Prep       | 19% CH <sub>3</sub> CN and 0.1% FA in H <sub>2</sub> O; flow rate 4.5 mL/min   | 24.8                 |
|                           | QC              | 18.5% CH <sub>3</sub> CN and 0.1% FA in H <sub>2</sub> O; flow rate 2.0 mL/min | 6.5                  |

**Table S4:** Biodistribution (mean  $\pm$  SD, n = 4) and uptake ratios of  $^{68}\text{Ga}$ -labeled GRPR-targeting tracers in PC-3 tumor-bearing mice. The mice in the blocked group were co-injected with 100  $\mu\text{g}$  of [D-Phe<sup>6</sup>,Leu-NHET<sup>13</sup>,des-Met<sup>14</sup>]Bombesin(6-14). \* and \*\* indicate  $p < 0.05$  and  $< 0.01$ , respectively, when comparing the 1 h and 1 h blocked data of [ $^{68}\text{Ga}$ ]Ga-TacBOMB2.

| Tissue<br>(%ID/g) | [ $^{68}\text{Ga}$ ]Ga-TacBOMB2 |                   | [ $^{68}\text{Ga}$ ]Ga-TacBOMB3 | [ $^{68}\text{Ga}$ ]Ga-AMBA |
|-------------------|---------------------------------|-------------------|---------------------------------|-----------------------------|
|                   | 1 h                             | 1 h blocked       | 1 h                             | 1 h                         |
| Blood             | 0.39 $\pm$ 0.12                 | 0.55 $\pm$ 0.19   | 1.06 $\pm$ 0.51                 | 0.58 $\pm$ 0.07             |
| Fat               | 0.10 $\pm$ 0.03                 | 0.07 $\pm$ 0.02   | 0.19 $\pm$ 0.18                 | 0.08 $\pm$ 0.02             |
| Testes            | 0.16 $\pm$ 0.05                 | 0.21 $\pm$ 0.16   | 0.37 $\pm$ 0.06                 | 0.20 $\pm$ 0.03             |
| Intestines        | 0.60 $\pm$ 0.12                 | 0.28 $\pm$ 0.07** | 1.06 $\pm$ 0.26                 | 8.62 $\pm$ 1.00             |
| Spleen            | 0.27 $\pm$ 0.10                 | 0.18 $\pm$ 0.05   | 0.50 $\pm$ 0.32                 | 2.49 $\pm$ 2.16             |
| Pancreas          | 1.30 $\pm$ 0.14                 | 0.15 $\pm$ 0.03** | 2.41 $\pm$ 0.72                 | 62.4 $\pm$ 4.26             |
| Stomach           | 0.54 $\pm$ 0.27                 | 0.13 $\pm$ 0.06*  | 0.82 $\pm$ 0.37                 | 2.32 $\pm$ 0.60             |
| Liver             | 0.29 $\pm$ 0.13                 | 0.29 $\pm$ 0.06   | 0.65 $\pm$ 0.19                 | 0.43 $\pm$ 0.05             |
| Kidneys           | 2.43 $\pm$ 0.16                 | 1.99 $\pm$ 0.59   | 4.61 $\pm$ 2.72                 | 5.70 $\pm$ 2.45             |
| Heart             | 0.14 $\pm$ 0.02                 | 0.16 $\pm$ 0.04   | 0.35 $\pm$ 0.18                 | 0.22 $\pm$ 0.02             |
| Lungs             | 0.39 $\pm$ 0.10                 | 0.39 $\pm$ 0.10   | 1.63 $\pm$ 0.75                 | 0.62 $\pm$ 0.06             |
| PC-3 tumor        | 5.95 $\pm$ 0.50                 | 0.92 $\pm$ 0.22** | 5.09 $\pm$ 0.54                 | 6.69 $\pm$ 1.03             |
| Bone              | 0.26 $\pm$ 0.11                 | 0.10 $\pm$ 0.03*  | 0.19 $\pm$ 0.09                 | 0.33 $\pm$ 0.13             |
| Muscle            | 0.13 $\pm$ 0.08                 | 0.13 $\pm$ 0.04   | 0.24 $\pm$ 0.12                 | 0.17 $\pm$ 0.01             |
| Brain             | 0.03 $\pm$ 0.01                 | 0.02 $\pm$ 0.00   | 0.04 $\pm$ 0.02                 | 0.04 $\pm$ 0.01             |
| Tumor/bone        | 28.9 $\pm$ 18.3                 | 8.94 $\pm$ 1.49*  | 29.9 $\pm$ 8.50                 | 22.6 $\pm$ 9.13             |
| Tumor/muscle      | 57.9 $\pm$ 32.8                 | 7.14 $\pm$ 1.40*  | 23.5 $\pm$ 9.61                 | 39.5 $\pm$ 7.46             |
| Tumor/blood       | 16.4 $\pm$ 5.64                 | 1.71 $\pm$ 0.18** | 5.61 $\pm$ 2.33                 | 11.7 $\pm$ 2.10             |
| Tumor/intestines  | 10.5 $\pm$ 3.06                 | 3.33 $\pm$ 0.67** | 4.93 $\pm$ 0.84                 | 0.79 $\pm$ 0.22             |
| Tumor/kidney      | 2.46 $\pm$ 0.33                 | 0.47 $\pm$ 0.04** | 1.34 $\pm$ 0.58                 | 1.36 $\pm$ 0.73             |
| Tumor/pancreas    | 4.64 $\pm$ 0.77                 | 6.22 $\pm$ 0.67*  | 2.21 $\pm$ 0.40                 | 0.11 $\pm$ 0.01             |

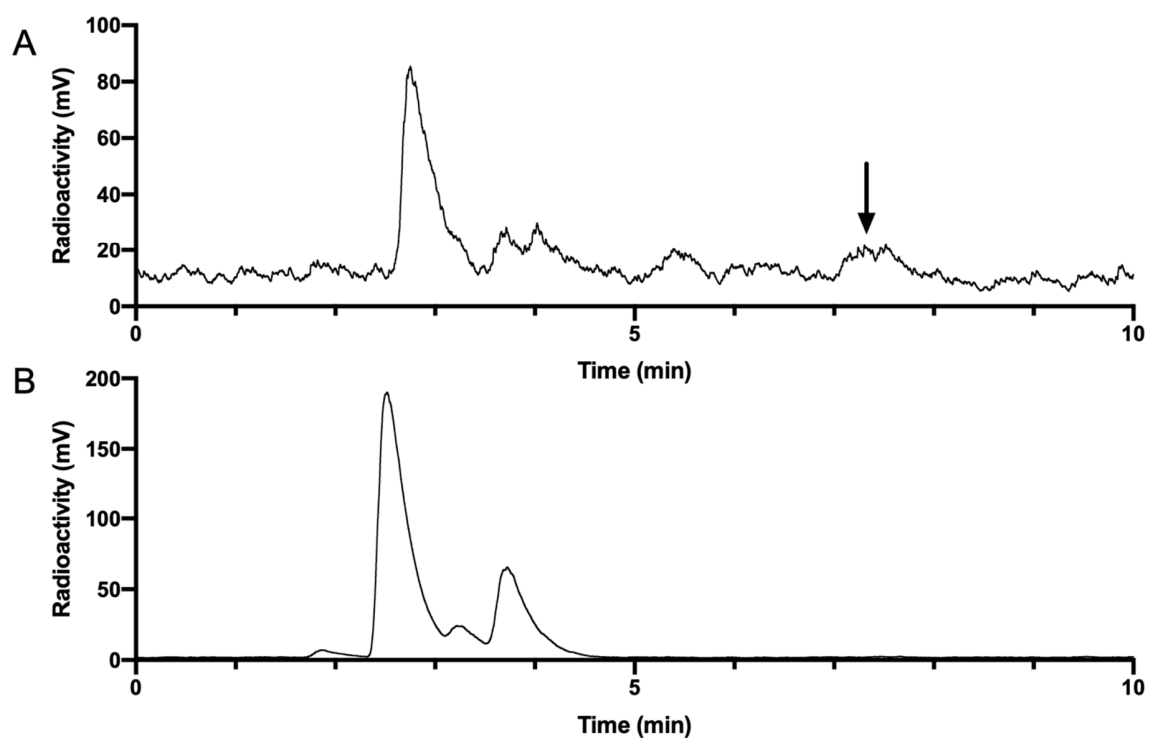

**Figure S1.** Representative radio-HPLC chromatograms from analysis of intact fraction of [ $^{68}\text{Ga}$ ]Ga-TacBOMB2 in mouse plasma (A) and urine (B) samples collected at 15 min post-injection. The peak pointed by an arrow is the intact tracer.

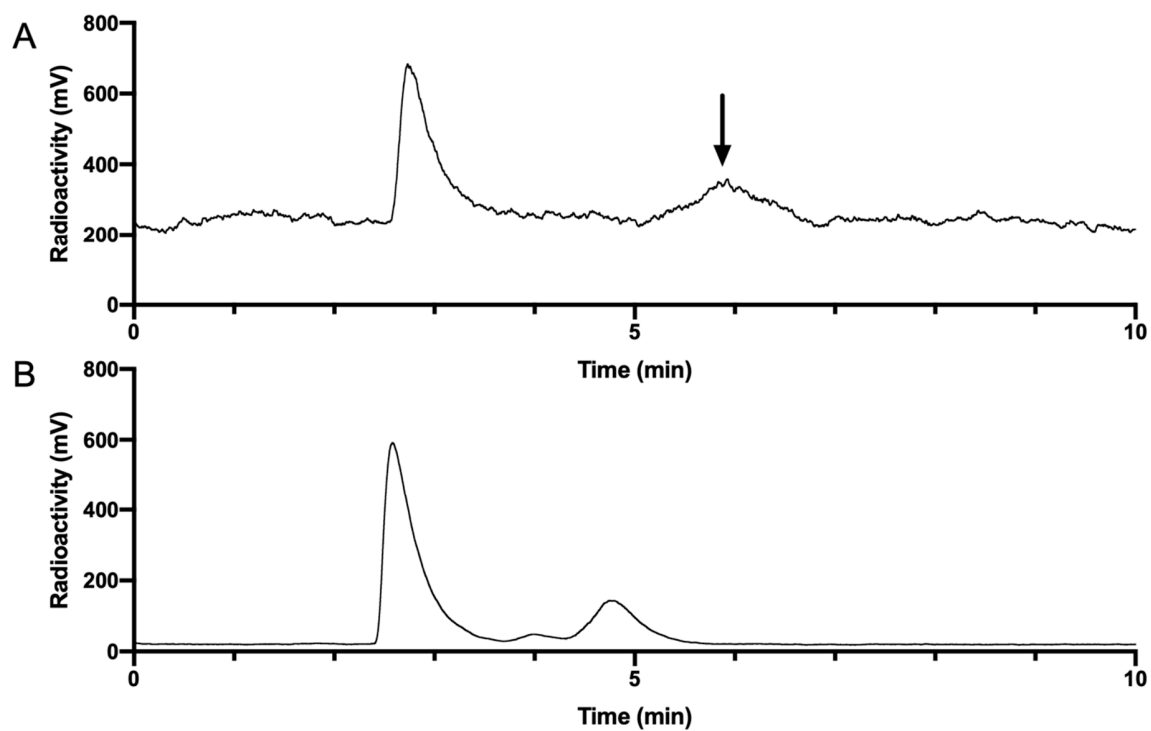

**Figure S2.** Representative radio-HPLC chromatograms from analysis of intact fraction of [ $^{68}\text{Ga}$ ]Ga-TacBOMB3 in mouse plasma (A) and urine (B) samples collected at 15 min post-injection. The peak pointed by an arrow is the intact tracer.

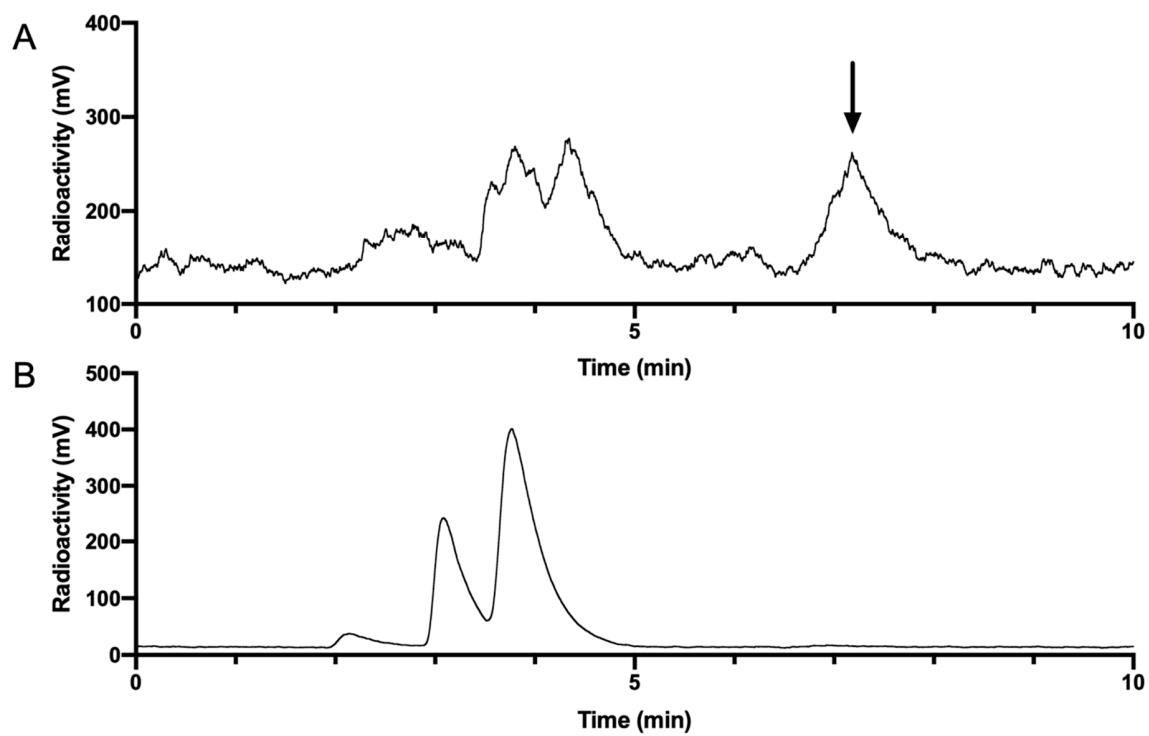

**Figure S3.** Representative radio-HPLC chromatograms from analysis of intact fraction of [ $^{68}\text{Ga}$ ]Ga-AMBA in mouse plasma (A) and urine (B) samples collected at 15 min post-injection. The peak pointed by an arrow is the intact tracer.
